# Supplementary material for: Circulating Zinc-α2-glycoprotein levels and Insulin Resistance in Polycystic Ovary Syndrome
Source: PubMed Central journal article supplement (PMC4867572; doi:10.1038/srep25934), 2016-05-16
Supplement: srep25934-s1.pdf [file srep25934-s1.pdf]

**Circulating Zinc- $\alpha$ 2-glycoprotein levels and Insulin Resistance in Polycystic  
Ovary Syndrome**

Yerui Lai<sup>1,+</sup>, Jinhua Chen<sup>1,+</sup>, Ling Li<sup>2</sup>, Jingxia Yin<sup>1</sup>, Junying He<sup>1</sup>, Mengliu Yang<sup>1</sup>, Yanjun Jia<sup>2</sup>,  
Dongfang Liu<sup>1</sup>, Hua Liu<sup>3</sup>, Yong Liao<sup>4</sup>, Gangyi Yang<sup>1,\*</sup>

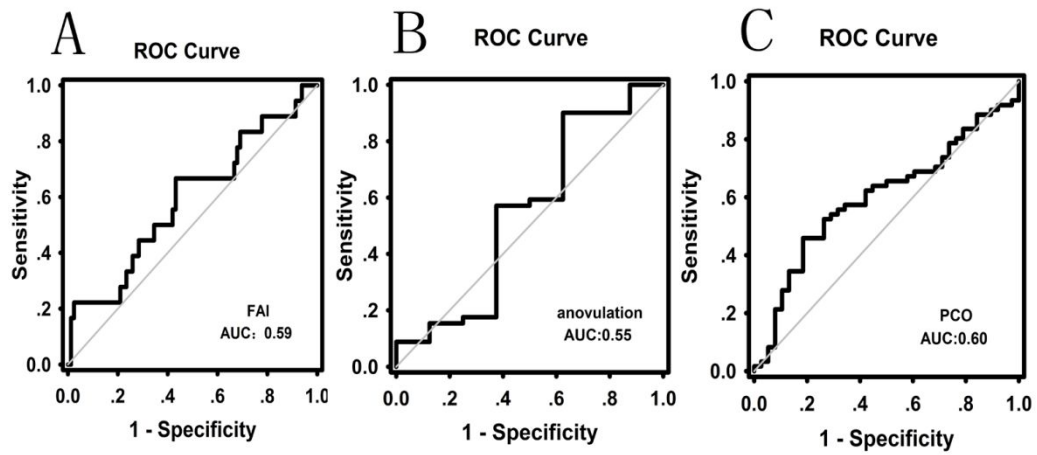

**Supplemental Figure 1.** ROC curve analyses were performed for (A) the prediction of free androgen index (FAI), (B) anovulation, and (C) polycystic ovaries (PCO)
